# Supplementary material for: Triazene-bridged energetic materials based on nitrotriazole: synthesis, characterization, and laser-ignited combustion performance
Source: Royal Society of Chemistry journal article supplement (doi:10.1039/d2dt04007g), 2023-01-01
Supplement: d2dt04007g1.pdf [file d2dt04007g1.pdf]

Supporting Information

**Triazene Bridged Energetic Materials Based on Nitrotriazole: Synthesis, Characterization and Laser Ignited Combustion Performance**

Xiue Jiang<sup>1</sup>, Yalin Yang<sup>1</sup>, Huiying Du<sup>1</sup>, Bo Yang<sup>2</sup>, Pengfei Tang<sup>2</sup>, Bo Wu<sup>1\*</sup>, Congming Ma<sup>3\*</sup>

1. State Key Laboratory of Environment-friendly Energy Materials, Southwest University of Science and Technology, Mianyang 621010, China.

2. Institute of Chemical Materials, China Academy of Engineering Physics, Mianyang 621900, China.

3. College of Safety Science and Engineering, Nanjing Tech University, Nanjing 211800, China.

Email: wubo@swust.edu.cn

Table of content

- 1. Computation details**
- 2. Crystallographic Data**
- 3. <sup>1</sup>H, <sup>13</sup>C NMR spectrum, DSC curves, MS spectrum**

## Computation details

### 1. Heats of formation (HOF)

Computations were carried out by using the Gaussian09 suite of programs.<sup>[1]</sup> The elementary geometric optimization and the frequency analysis were performed at the level of Becke three Lee-Yan-Parr (B3LYP) Functionals<sup>[2]</sup> with 6-311+G\*\* basis set.<sup>[3]</sup> All of the optimized structures were characterized to be local energy minima on the potential surface without any imaginary frequencies. The predictions of heats of formation (HOF) adopt the hybrid DFT-B3LYP methods with 6-311+G\*\* basis set via designed isodesmic reactions. The isodesmic reaction processes, i.e., the number of each kind of formal bond is conserved, are used with application of the bond separation reaction (BSR) rules. The molecule is broken down into a set of two heavy-atom molecules containing the same component bonds. The isodesmic reactions used to derive the HOF of these compounds are in Scheme S1.

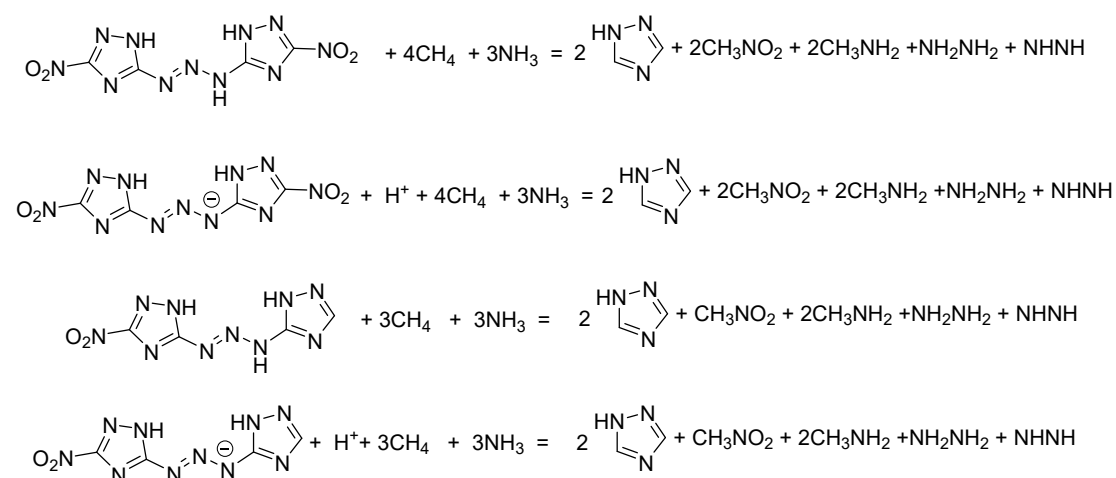

The change of enthalpy for the reactions at 298 K can be expressed as:

$$\Delta H_{298} = \sum \Delta_f H_P - \sum \Delta_f H_R \quad (1)$$

Where  $\Delta_f H_R$  and  $\Delta_f H_P$  are the HOF of reactants and products at 298 K, respectively, and  $\Delta H_{298}$  can be calculated using the following expression:

$$\Delta H_{298} = \Delta E_{298} + \Delta(PV) = \Delta E_0 + \Delta ZPE + \Delta H_T + \Delta nRT \quad (2)$$

Where  $E_0$  is the change in total energy between the products and the reactants at 0 K;  $\Delta ZPE$  is the difference between the zero-point energies (ZPE) of the products and the reactants at 0 K;  $\Delta H_T$  is thermal correction from 0 to 298 K. The  $\Delta(PV)$  value in eq (2) is the  $PV$  work term. It equals  $\Delta nRT$  for the reactions of ideal gas. For the isodesmic reactions,  $\Delta n = 0$ , so  $\Delta(PV) = 0$ . On the left side of Eq. (1), apart from target compound, all the others are called reference compounds. The HOF of reference compounds are available either from the experiments<sup>[4-6]</sup> or from the high level computing like CBS-4M.

For ionic energetic compounds, the HOF can be simplified by eq 3:

$$\Delta H_f^0(\text{salt}, 298 \text{ K}) = \Delta H_f^0(\text{cation}, 298 \text{ K}) + \Delta H_f^0(\text{anion}, 298 \text{ K}) - \Delta H_L \quad (3)$$

where  $\Delta H_L$  is the lattice energy of the salts that can be predicted by the formula suggested by Jenkins et al. as:

$$\Delta H_L = U_{\text{POT}} + [p(nM/2 - 2) + q(nX/2 - 2)]RT \quad (4)$$

where  $nM$  and  $nX$  depend on the nature of the ions  $Mp^+$  and  $Xq^-$ , respectively, and are equal to 3 for monatomic ions, 5 for linear polyatomic ions, and 6 for nonlinear polyatomic ions. The

equation for lattice potential energy UPOT (kJ mol<sup>-1</sup>) is as follows:

$$U_{\text{POT}} (\text{kJ mol}^{-1}) = \gamma (\rho_m/M_m)^{1/3} + \delta \quad (5)$$

where  $\rho$  (g cm<sup>-3</sup>) is the density and  $M$  (g mol<sup>-1</sup>) is the chemical formula mass of the ionic material. For 1:1 (charge ratio) salts, the coefficients  $\gamma$  and  $\delta$  are 1981.2 kJ mol<sup>-1</sup>·cm and 103.8 kJ mol<sup>-1</sup>, respectively.<sup>[7]</sup>

## 2. Bond dissociation energy (BDE)

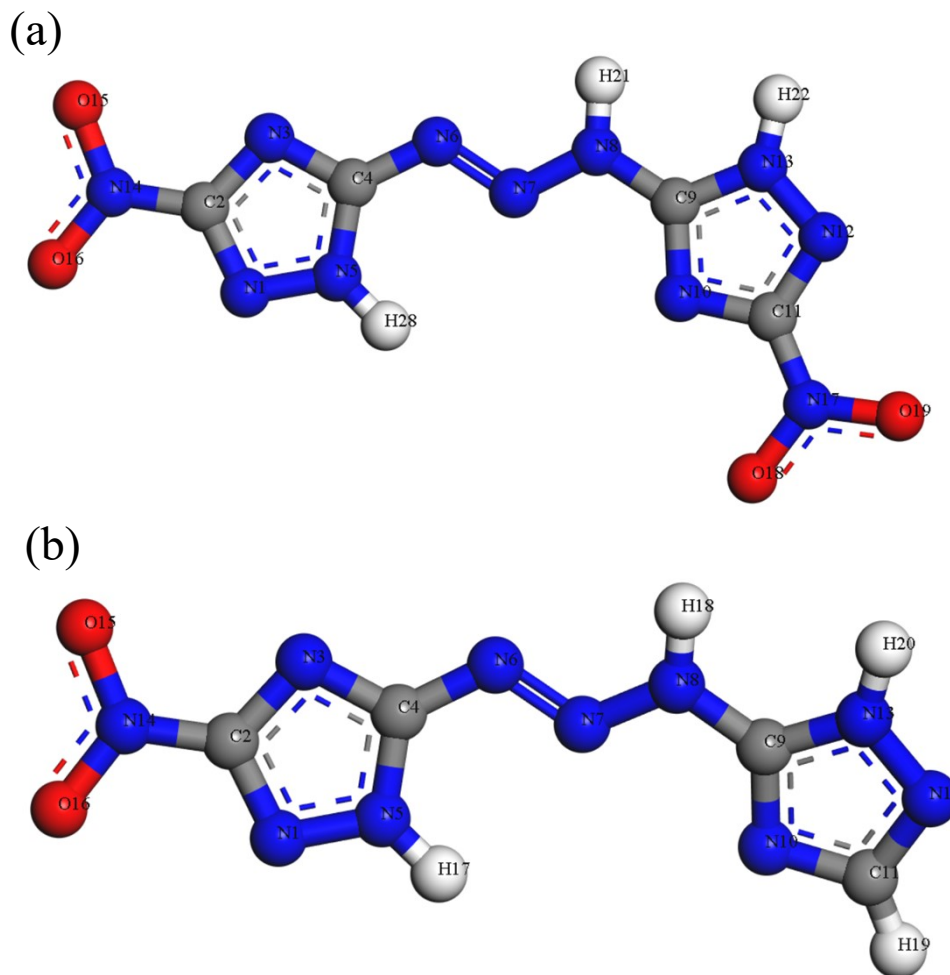

**Figure S1.** Molecular structures of **1** (a) and **6** (b)

**Table S1** Bond orders of compounds **1** and **6**

|         | <b>1</b> |         | <b>6</b> |
|---------|----------|---------|----------|
| N8—H21  | 0.651924 | N8—H18  | 0.654682 |
| N5—H20  | 0.682571 | N13—H20 | 0.687594 |
| N13—H22 | 0.685666 | N5—H17  | 0.688586 |
| C11—N17 | 0.733126 | N12—N13 | 0.718758 |
| C2—N14  | 0.739369 | C2—N14  | 0.739399 |
| N12—N13 | 0.755071 | N1—N5   | 0.817222 |
| N1—N5   | 0.840481 | C11—H19 | 0.863725 |
| N7—N8   | 0.903082 | N7—N8   | 0.946384 |
| N14—O16 | 0.97285  | N14—O16 | 0.962055 |

|         |          |         |          |
|---------|----------|---------|----------|
| N17—O19 | 0.976253 | N8—C9   | 0.965729 |
| N14—O15 | 0.979089 | N14—O15 | 0.980818 |
| N17—O18 | 0.980465 | C4—N5   | 0.996932 |
| N8—C9   | 0.999195 | N10—C11 | 1.023973 |
| C4—N5   | 1.001787 | C4—N6   | 1.035579 |
| C4—N6   | 1.021403 | C9—N13  | 1.039462 |
| C9—N13  | 1.022193 | C2—N3   | 1.120271 |
| N10—C11 | 1.076439 | N3—C4   | 1.277199 |
| C2—N3   | 1.12728  | C9—N10  | 1.296883 |
| N3—C4   | 1.281321 | N1—C2   | 1.333648 |
| C9—N10  | 1.295943 | N6—N7   | 1.342435 |
| N1—C2   | 1.337029 | C11—N12 | 1.363705 |
| N6—N7   | 1.374392 |         |          |
| C11—N12 | 1.377606 |         |          |

### Crystallographic Data

**Table S2** Crystallographic details of **1** and **2**

| Crystals                          | <b>1</b>                                                     | <b>2</b>                                                                      |
|-----------------------------------|--------------------------------------------------------------|-------------------------------------------------------------------------------|
| CCDC                              | 2225841                                                      | 2225842                                                                       |
| Formula                           | C <sub>4</sub> H <sub>7</sub> N <sub>11</sub> O <sub>6</sub> | C <sub>8</sub> H <sub>14</sub> K <sub>6</sub> N <sub>22</sub> O <sub>15</sub> |
| Formula weight                    | 305.21                                                       | 893.01                                                                        |
| Temperature                       | 146(2) K                                                     | 150(2) K                                                                      |
| Crystal system                    | monoclinic                                                   | monoclinic                                                                    |
| Space group                       | <i>P</i> 2 <sub>1</sub> / <i>c</i>                           | <i>P</i> 2/ <i>c</i>                                                          |
| $\rho$ /g·cm <sup>-3</sup>        | 1.765                                                        | 1.910                                                                         |
| <i>a</i> /Å                       | 10.4637(5)                                                   | 12.0707(5)                                                                    |
| <i>b</i> /Å                       | 16.3279(7)                                                   | 7.3415(3)                                                                     |
| <i>c</i> /Å                       | 6.8604(3)                                                    | 18.2512(7)                                                                    |
| $\alpha$ /(°)                     | 90                                                           | 90                                                                            |
| $\beta$ /(°)                      | 101.482(2)                                                   | 106.260(2)                                                                    |
| $\gamma$ /(°)                     | 90                                                           | 90                                                                            |
| Goodness-of-fit on F <sup>2</sup> | 1.037                                                        | 1.044                                                                         |
| R                                 | 0.0376                                                       | 0.0681                                                                        |
| wR                                | 0.0890                                                       | 0.1312                                                                        |

**Table S3** Bond lengths of compounds **1** and **2**

|       | <b>1</b>   | <b>2</b> |          |
|-------|------------|----------|----------|
| C1—N2 | 1.3071(15) | N1—C1    | 1.332(4) |
| C1—N3 | 1.3473(14) | N1—C2    | 1.351(4) |
| C1—N1 | 1.4510(14) | N2—N3    | 1.373(4) |

|        |            |        |          |
|--------|------------|--------|----------|
| C2—N3  | 1.3314(14) | N2—C1  | 1.326(4) |
| C2—N4  | 1.3414(14) | N2—C2  | 1.352(4) |
| C2—N5  | 1.3752(14) | N4—C1  | 1.437(4) |
| C3—N10 | 1.3314(16) | N5—N6  | 1.301(4) |
| C3—N8  | 1.3442(14) | N5—C2  | 1.392(4) |
| C3—N7  | 1.3964(14) | N6—N7  | 1.305(4) |
| C4—N9  | 1.3138(15) | N7—C3  | 1.395(4) |
| C4—N10 | 1.3415(14) | N8—C3  | 1.353(4) |
| C4—N11 | 1.4562(15) | N8—C4  | 1.342(4) |
| N1—O2  | 1.2166(14) | N9—N10 | 1.370(4) |
| N1—O1  | 1.2294(14) | N9—C3  | 1.341(4) |
| N2—N4  | 1.3551(13) | N10—C4 | 1.324(4) |
| N5—N6  | 1.3305(13) | N11—C4 | 1.426(4) |
| N6—N7  | 1.2650(13) | O1—N4  | 1.229(4) |
| N8—N9  | 1.3469(13) | O2—N4  | 1.245(4) |
| N11—O4 | 1.2107(14) | O3—N11 | 1.233(4) |
| N11—O3 | 1.2294(14) | O4—N11 | 1.239(4) |

**Table S4** Bond angles of compounds **1** and **2**

| <b>1</b>   |            | <b>2</b>  |          |
|------------|------------|-----------|----------|
| N2—C1—N3   | 118.20(10) | C1—N1—C2  | 99.4(3)  |
| N2—C1—N1   | 120.50(10) | C1—N2—N3  | 103.7(3) |
| N3—C1—N1   | 121.30(10) | C2—N3—N2  | 105.5(3) |
| N3—C2—N4   | 111.64(10) | O1—N4—O2  | 123.7(3) |
| N3—C2—N5   | 124.94(10) | O1—N4—C1  | 117.9(3) |
| N4—C2—N5   | 123.40(10) | O2—N4—C1  | 118.4(3) |
| N10—C3—N8  | 110.69(10) | N6—N5—C2  | 111.0(3) |
| N10—C3—N7  | 129.23(10) | N5—N6—N7  | 112.1(3) |
| N8—C3—N7   | 120.07(10) | N6—N7—C3  | 111.7(3) |
| N9—C4—N10  | 117.91(11) | C4—N8—C3  | 98.6(3)  |
| N9—C4—N11  | 119.69(10) | C3—N9—N10 | 105.7(3) |
| N10—C4—N11 | 122.39(10) | C4—N10—N9 | 103.7(2) |
| O2—N1—O1   | 125.34(10) | O3—N11—O4 | 123.6(3) |
| O2—N1—C1   | 118.24(10) | O3—N11—C4 | 117.3(3) |
| O1—N1—C1   | 116.42(10) | O4—N11—C4 | 119.1(3) |
| C1—N2—N4   | 101.18(9)  | N1—C1—N4  | 121.5(3) |
| C2—N3—C1   | 99.80(9)   | N2—C1—N1  | 117.4(3) |
| C2—N4—N2   | 109.17(9)  | N2—C1—N4  | 121.1(3) |
| N6—N5—C2   | 114.81(9)  | N1—C2—N3  | 114.1(3) |
| N7—N6—N5   | 112.77(10) | N1—C2—N5  | 126.6(3) |
| N6—N7—C3   | 109.81(10) | N3—C2—N5  | 119.3(3) |
| C3—N8—N9   | 109.99(10) | N8—C3—N7  | 126.9(3) |

|           |            |            |          |
|-----------|------------|------------|----------|
| C4—N9—N8  | 100.91(9)  | N9—C3—N7   | 118.4(3) |
| C3—N10—C4 | 110.51(9)  | N9—C3—N8   | 114.7(3) |
| C4—N11—O3 | 125.93(11) | N10—C4—N8  | 117.4(3) |
| C4—N11—C4 | 117.46(10) | N10—C4—N11 | 121.5(3) |
| C3—N11—C4 | 116.61(10) |            |          |

**Table S5** The torsion angles of compounds **1** and **2**

| <b>1</b>      |             | <b>2</b>      |           |
|---------------|-------------|---------------|-----------|
| C1—N2—N4—C2   | -0.21(12)   | O1—N4—C1—N1   | -4.6(5)   |
| C2—N5—N6—N7   | 177.89(10)  | O1—N4—C1—N2   | 176.6(3)  |
| N5—N6—N7—C3   | 178.40(9)   | O2—N4—C1—N1   | 175.2(3)  |
| C3—N8—N9—C4   | 0.05(12)    | O2—N4—C1—N2   | -3.6(5)   |
| N2—C1—N1—O1   | -178.94(11) | O3—N11—C4—N8  | -1.1(5)   |
| N2—C1—N1—O2   | 0.58(17)    | O3—N11—C4—N10 | -177.4(3) |
| N3—C1—N1—O1   | 0.96(17)    | O4—N11—C4—N8  | -179.7(3) |
| N3—C1—N1—O2   | -179.52(11) | O4—N11—C4—N10 | 1.9(5)    |
| N1—C1—N2—N4   | 179.98(12)  | N2—N3—C2—N1   | -0.3(4)   |
| N3—C1—N2—N4   | 0.08(13)    | N2—N3—C2—N5   | -178.5(3) |
| N1—C1—N3—C2   | -179.83(11) | N3—N2—C1—N1   | 0.9(4)    |
| N2—C1—N3—C2   | 0.07(14)    | N3—N2—C1—N4   | 179.7(3)  |
| N4—C2—N3—C1   | -0.21(13)   | N5—N6—N7—C3   | -177.5(3) |
| N5—C2—N3—C1   | 178.35(11)  | N6—N5—C2—N1   | 15.2(5)   |
| N3—C2—N4—N2   | 0.28(14)    | N6—N5—C2—N3   | -166.8(3) |
| N5—C2—N4—N2   | -178.30(11) | N6—N7—C3—N8   | 16.2(5)   |
| N3—C2—N5—N6   | -175.76(11) | N6—N7—C3—N9   | -164.8(3) |
| N4—C2—N5—N6   | 2.64(16)    | N9—N10—C4—N8  | 0.2(4)    |
| N8—C3—N7—N6   | 175.79(10)  | N9—N10—C4—N11 | 178.8(3)  |
| N10—C3—N7—N6  | -5.67(17)   | N10—N9—C3—N7  | 179.5(3)  |
| N7—C3—N8—N9   | 178.64(100) | N10—N9—C3—N8  | -1.4(4)   |
| N10—C3—N8—N9  | -0.15(14)   | C1—N1—C2—N3   | 0.8(4)    |
| N7—C3—N10—C4  | -178.48(12) | C1—N1—C2—N5   | 178.8(4)  |
| N8—C3—N10—C4  | 0.16(12)    | C1—N2—N3—C2   | -0.3(4)   |
| N10—C4—N9—N8  | 0.05(14)    | C2—N1—C1—N2   | -1.1(4)   |
| N11—C4—N9—N8  | 179.07(10)  | C2—N1—C1—N4   | -179.9(3) |
| N9—C4—N10—C3  | -0.14(14)   | C2—N5—N6—N7   | -175.1(3) |
| N11—C4—N10—C3 | -179.13(11) | C3—N8—C4—N10  | -1.0(4)   |
| N9—C4—N11—O3  | 1.27(17)    | C3—N8—C4—N11  | -179.5(3) |
| N9—C4—N11—O4  | -178.92(11) | C3—N9—N10—C4  | 0.6(3)    |
| N10—C4—N11—O3 | -179.76(11) | C4—N8—C3—N7   | -179.6(3) |
| N10—C4—N11—O4 | 0.05(18)    | C4—N8—C3—N9   | 1.4(4)    |

**Table S6** Hydrogen bonds of compound **1**

| <b>D—H...A</b> | <b>d(D-H)/ Å</b> | <b>d(H...A)/ Å</b> | <b>d(D...A)/ Å</b> | <b>&lt;(DHA)/ °</b> |
|----------------|------------------|--------------------|--------------------|---------------------|
| N4—H4...O6     | 0.88             | 1.80               | 2.6807(13)         | 175                 |
| N5—H5...O5     | 0.88             | 1.83               | 2.6904(15)         | 165                 |
| O5—H5A...O1    | 0.85             | 2.16               | 2.9456(12)         | 153                 |
| O5—H5B...O3    | 0.86             | 2.33               | 3.1280(15)         | 155                 |
| O5—H5B...N9    | 0.86             | 2.24               | 2.8923(13)         | 132                 |
| O6—H6A...N10   | 0.85             | 2.18               | 2.9871(13)         | 159                 |
| O6—H6B...N2    | 0.85             | 2.13               | 2.9374(14)         | 158                 |
| N8—H8...O1     | 0.88             | 2.51               | 3.2134(15)         | 138                 |
| N8—H8...N3     | 0.88             | 2.14               | 2.9363(15)         | 151                 |

**Table S7** Hydrogen bonds of compound **2**

| <b>D—H...A</b> | <b>d(D-H)/ Å</b> | <b>d(H...A)/ Å</b> | <b>d(D...A)/ Å</b> | <b>&lt;(DHA)/ °</b> |
|----------------|------------------|--------------------|--------------------|---------------------|
| O5—H5A...N5    | 0.87             | 2.20               | 2.853(4)           | 132                 |
| O5—H5B...O6    | 0.87             | 2.48               | 2.890(8)           | 109                 |
| O5—H5B...N9    | 0.87             | 2.56               | 2.942(4)           | 108                 |
| O6—H6A...O5    | 0.87             | 2.08               | 2.890(8)           | 154                 |
| O6—H6B...O9    | 0.87             | 2.01               | 2.821(7)           | 155                 |
| O7—H7...N7     | 0.85             | 2.01               | 2.865(3)           | 176                 |
| O8—H8A...N9    | 0.87             | 2.07               | 2.942(6)           | 180                 |
| O8—H8B...N7    | 0.87             | 2.22               | 3.091(6)           | 175                 |
| O9—H9...N3     | 0.87             | 2.08               | 2.893(3)           | 156                 |

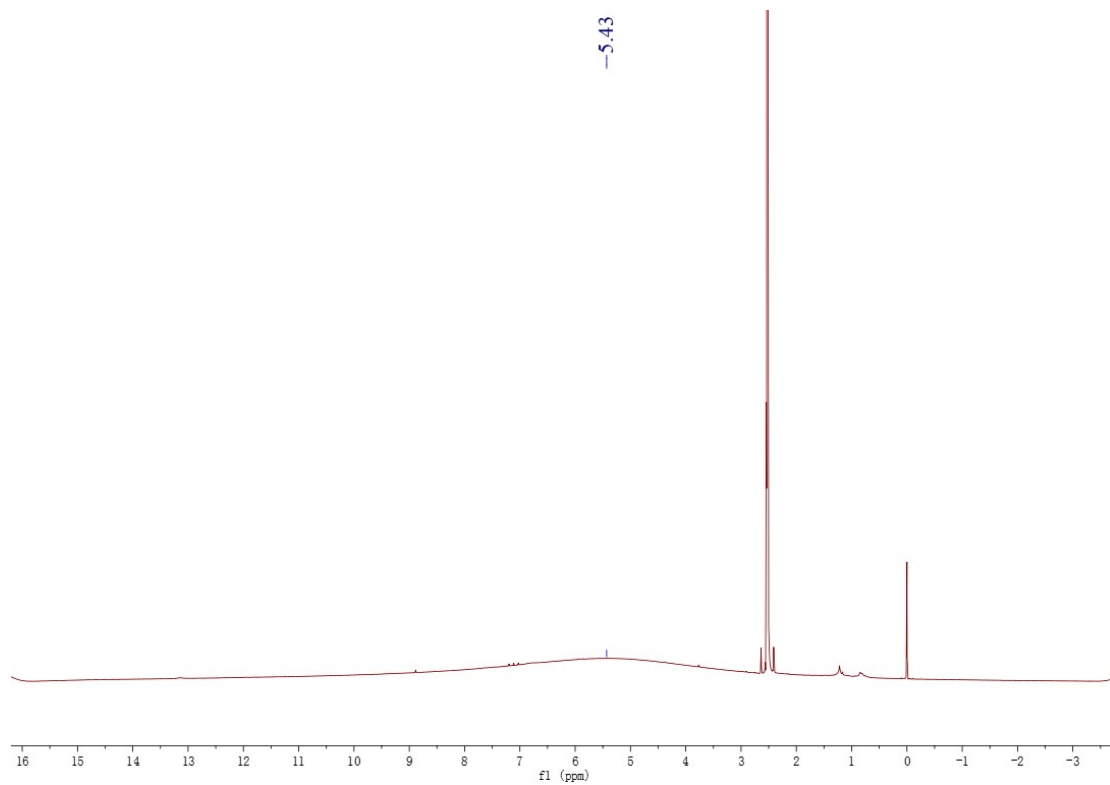

**Figure S2.**  $^1\text{H}$  NMR of **1** ( $d_6$ -DMSO)

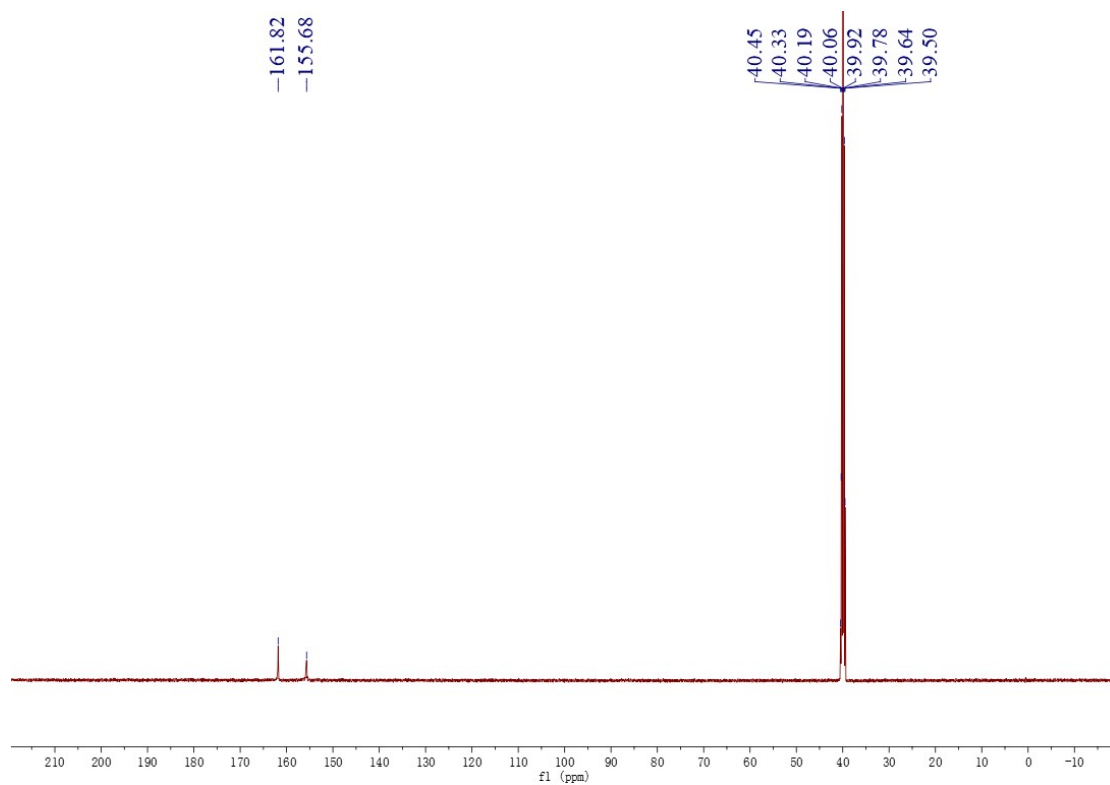

**Figure S3**  $^{13}\text{C}$  NMR of **1** ( $d_6$ -DMSO)



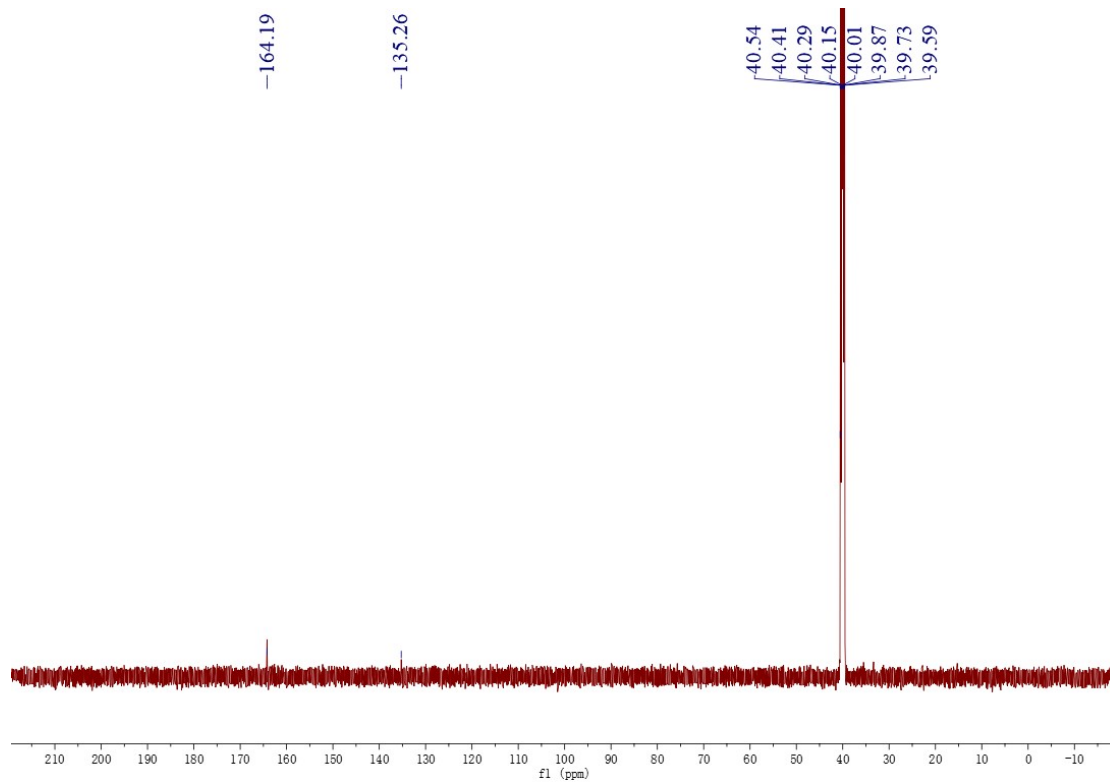

**Figure S4** <sup>13</sup>C NMR of 2 (*d*<sub>6</sub>-DMSO)

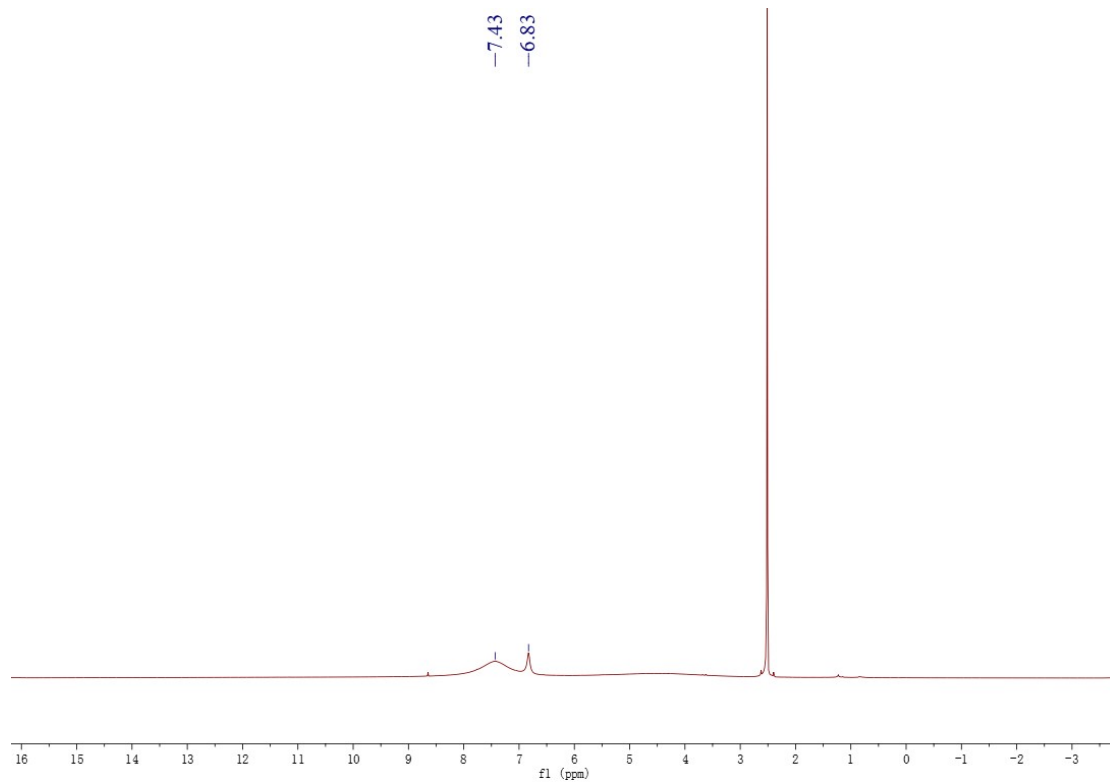

**Figure S5** <sup>1</sup>H NMR of 3 (*d*<sub>6</sub>-DMSO)

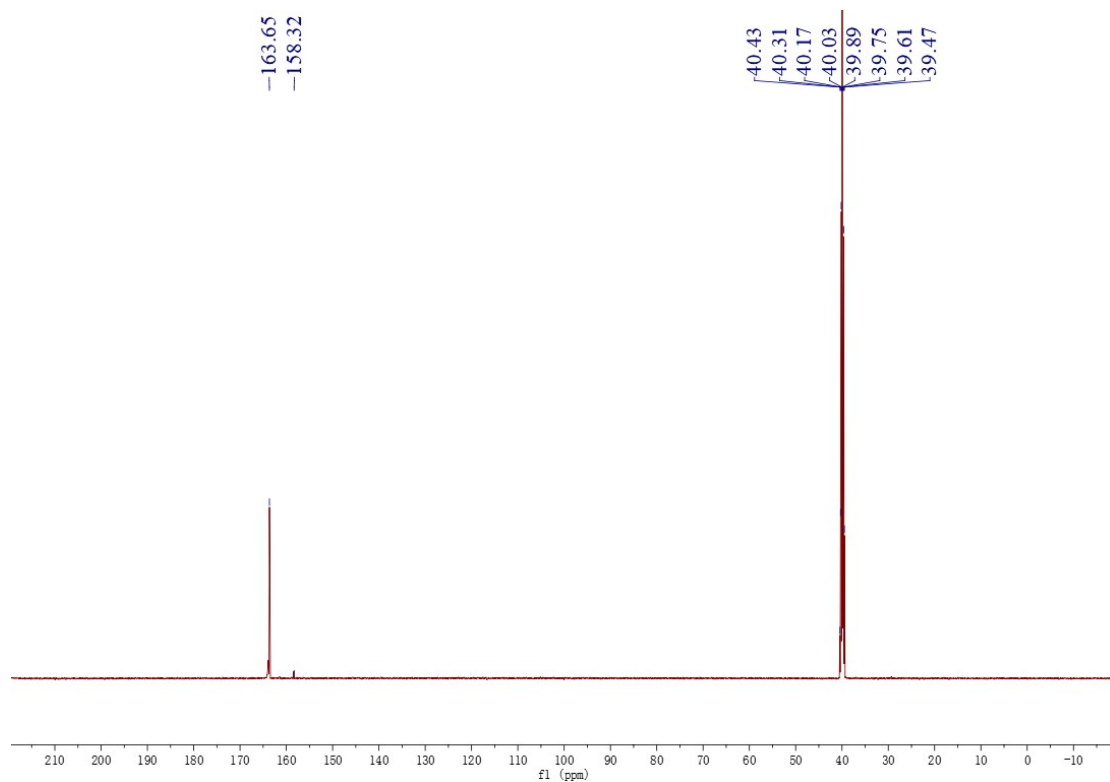

Figure S6  $^{13}\text{C}$  NMR of **3** ( $d_6$ -DMSO)

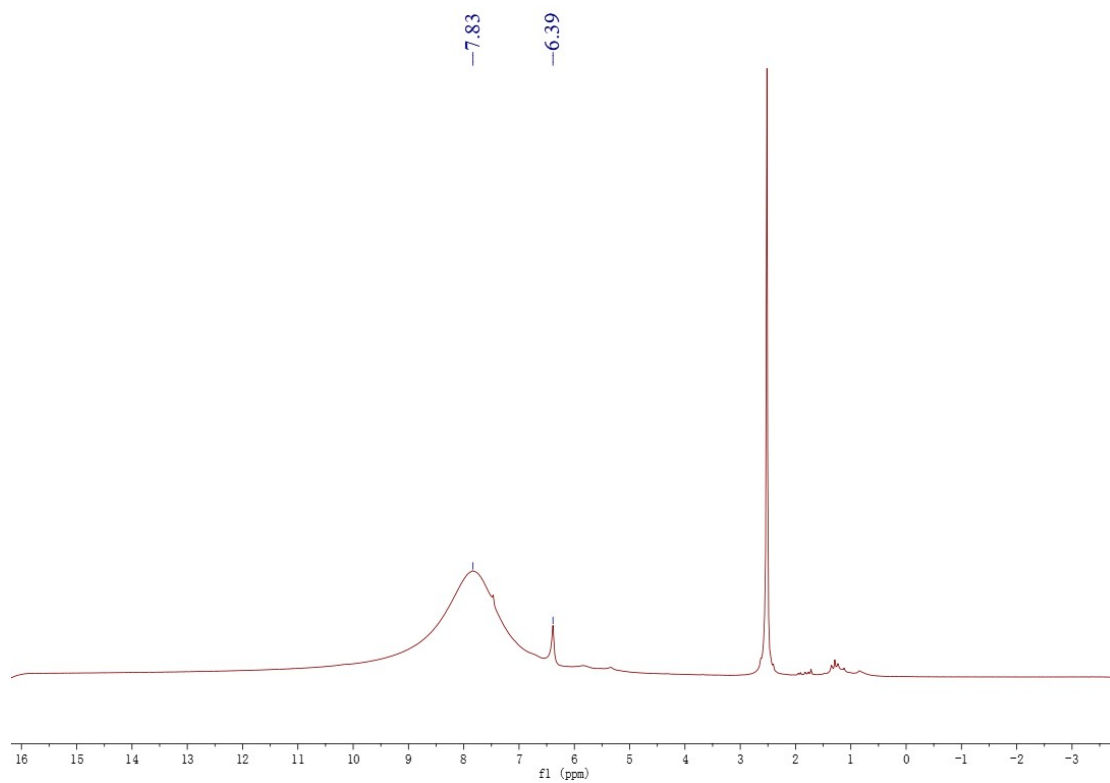

Figure S7  $^1\text{H}$  NMR of **4** ( $d_6$ -DMSO)

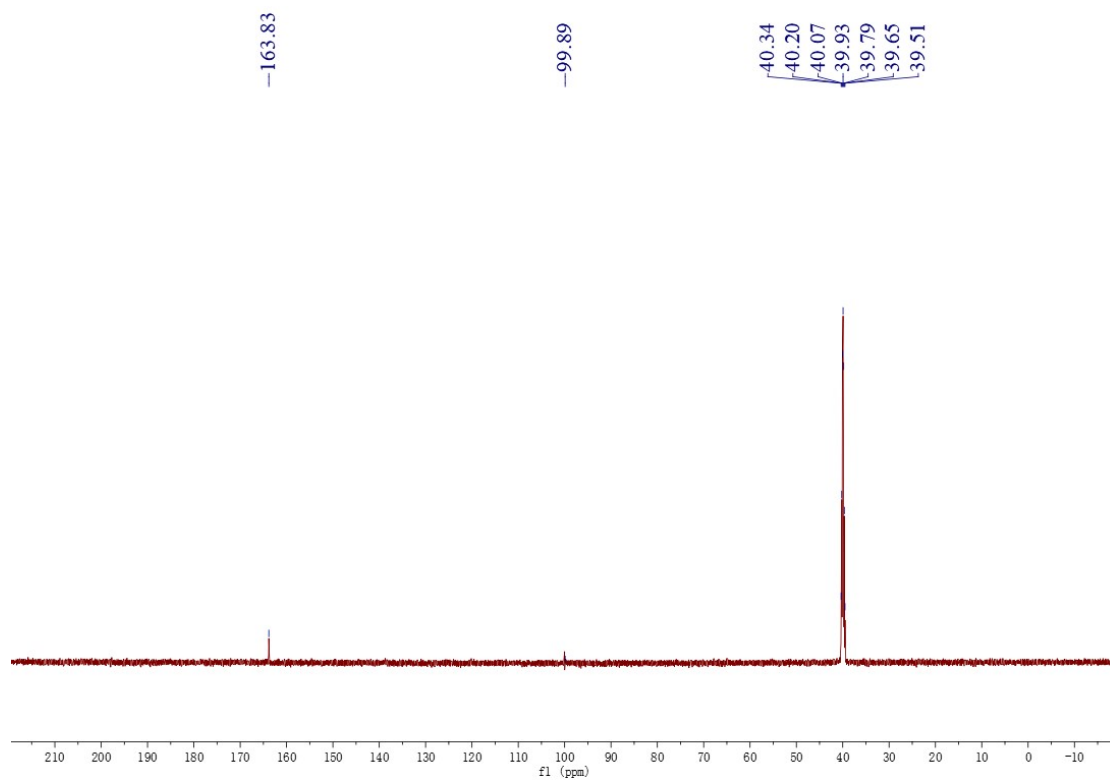

**Figure S8**  $^{13}\text{C}$  NMR of **4** ( $d_6$ -DMSO)

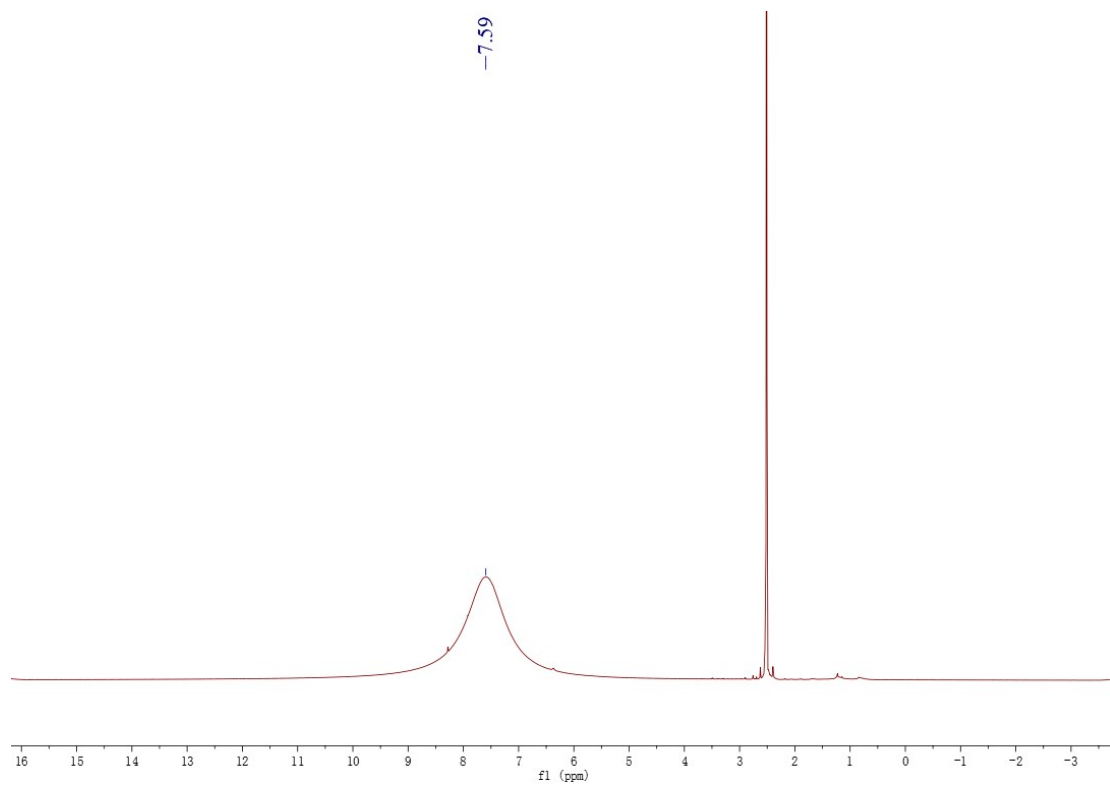

**Figure S9**  $^1\text{H}$  NMR of **5** ( $d_6$ -DMSO)

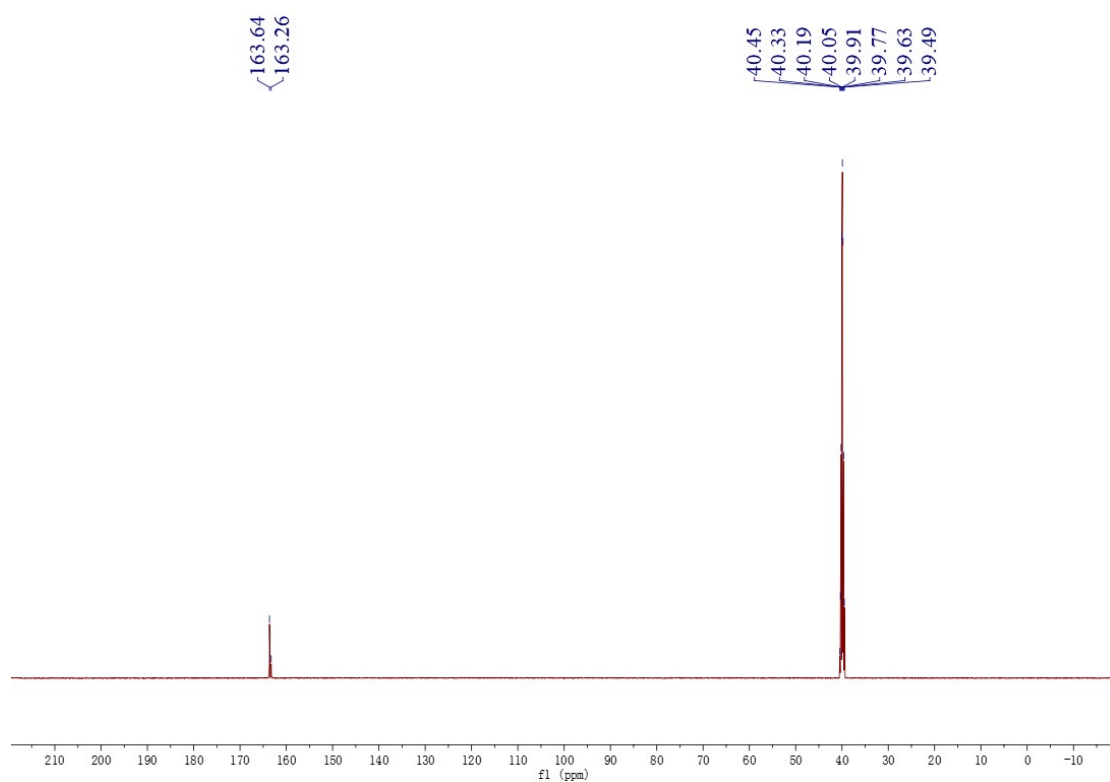

**Figure S10** <sup>13</sup>C NMR of **5** (*d*<sub>6</sub>-DMSO)

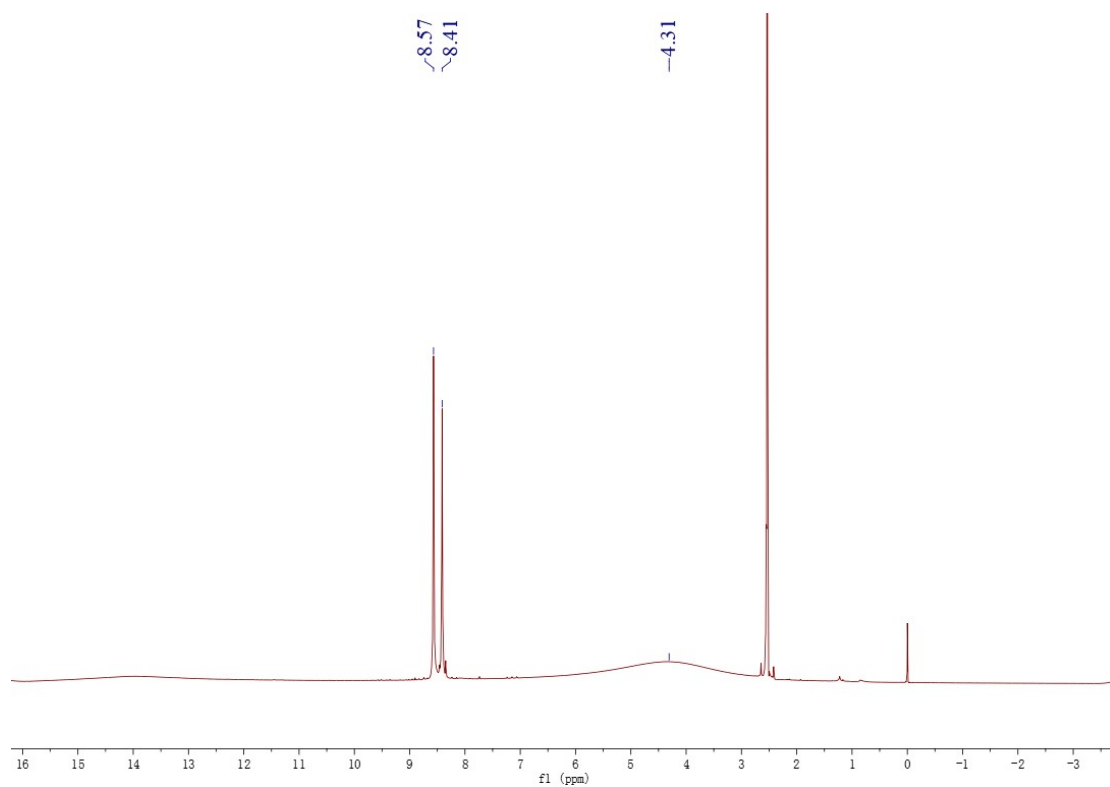

**Figure S11** <sup>1</sup>H NMR of **6** (*d*<sub>6</sub>-DMSO)

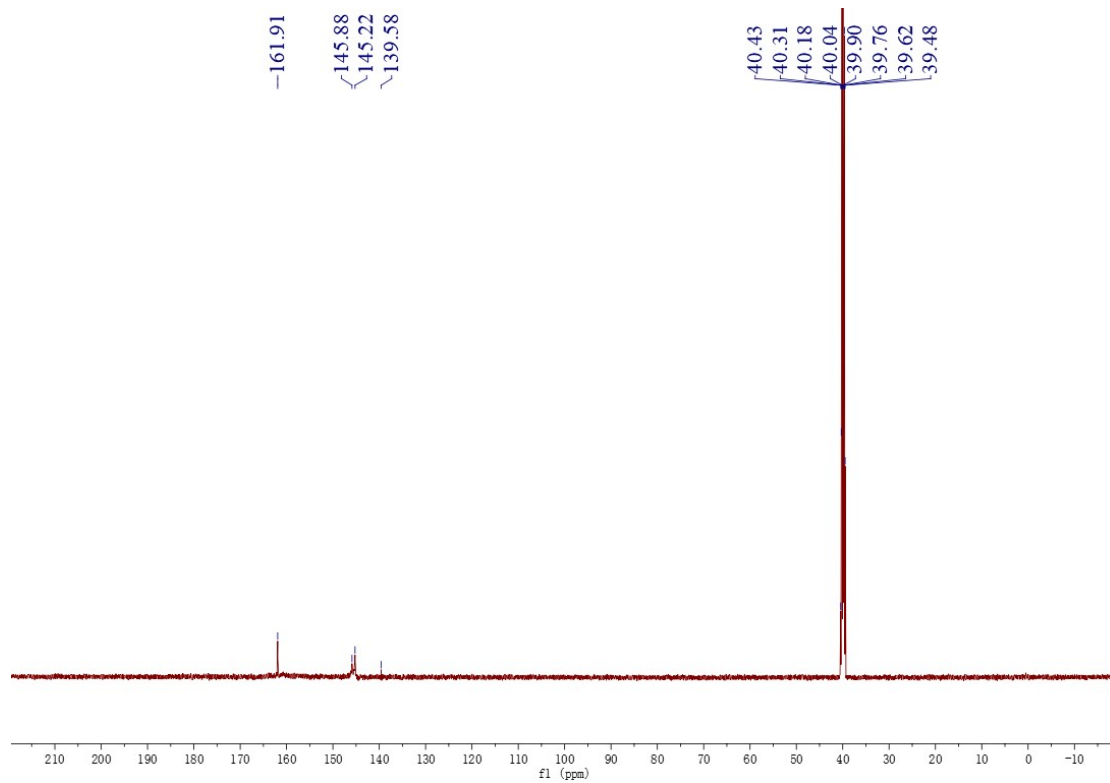

**Figure S12**  $^{13}\text{C}$  NMR of **6** ( $d_6$ -DMSO)

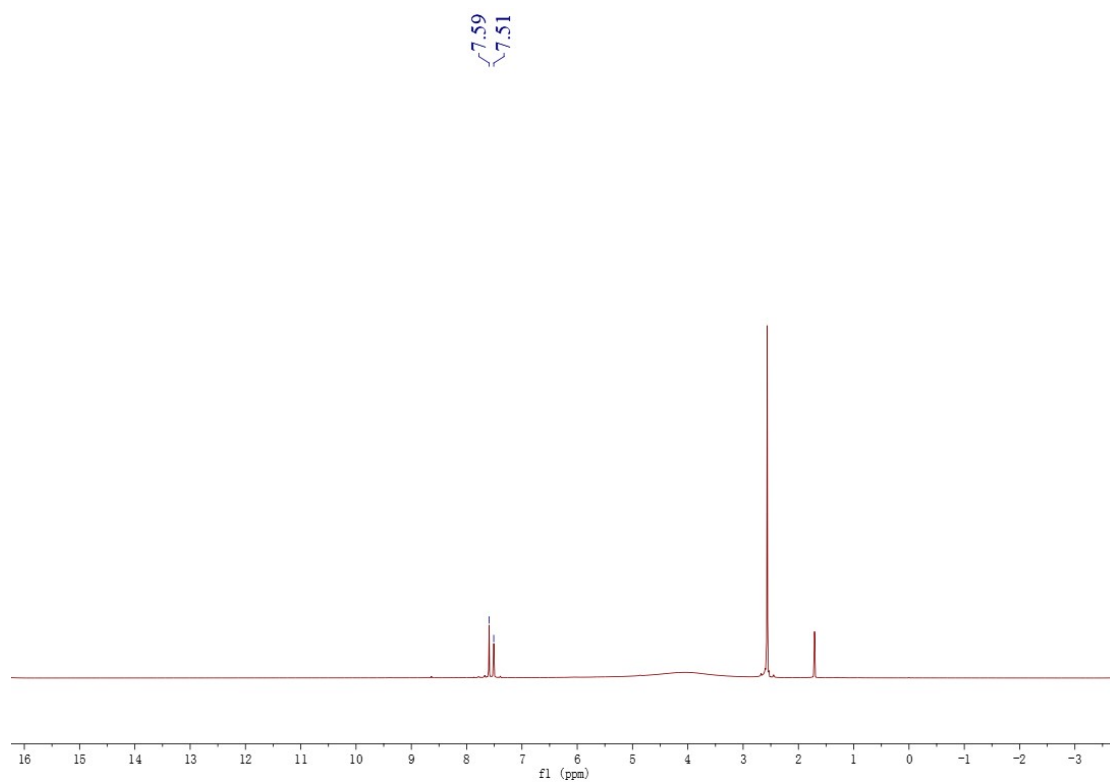

**Figure S13**  $^1\text{H}$  NMR of **7** ( $d_6$ -DMSO)

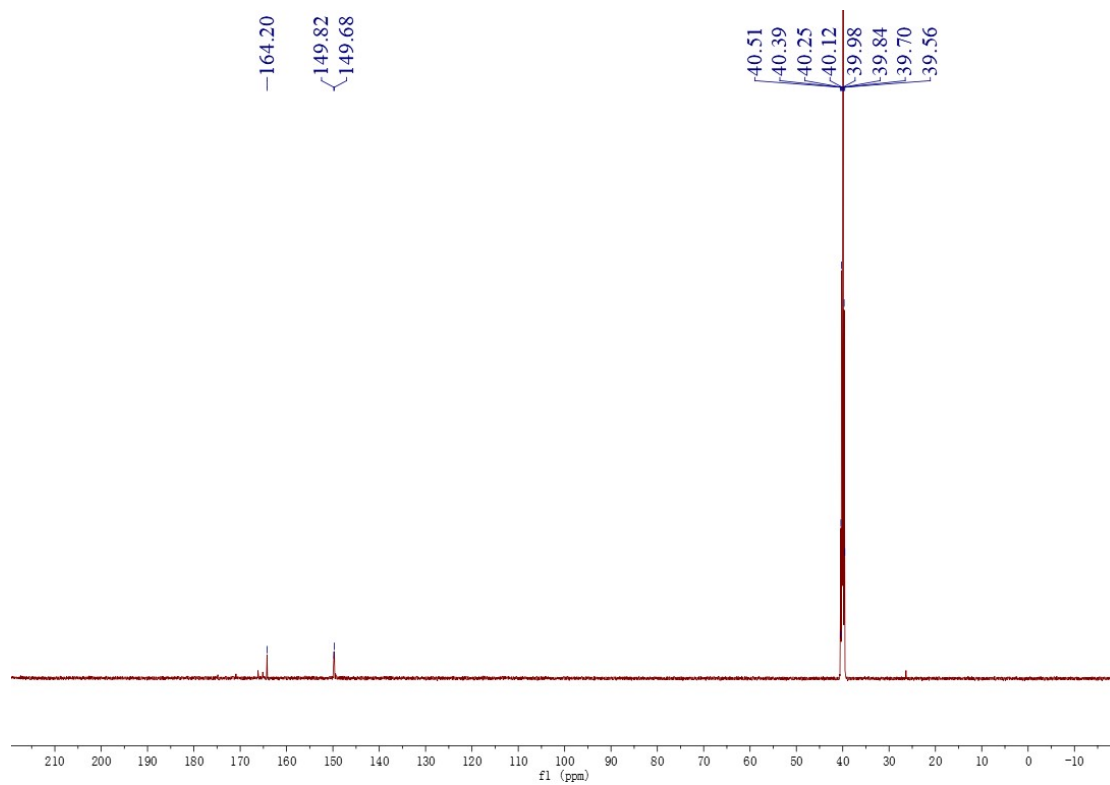

**Figure S14**  $^{13}\text{C}$  NMR of **7** ( $d_6$ -DMSO)

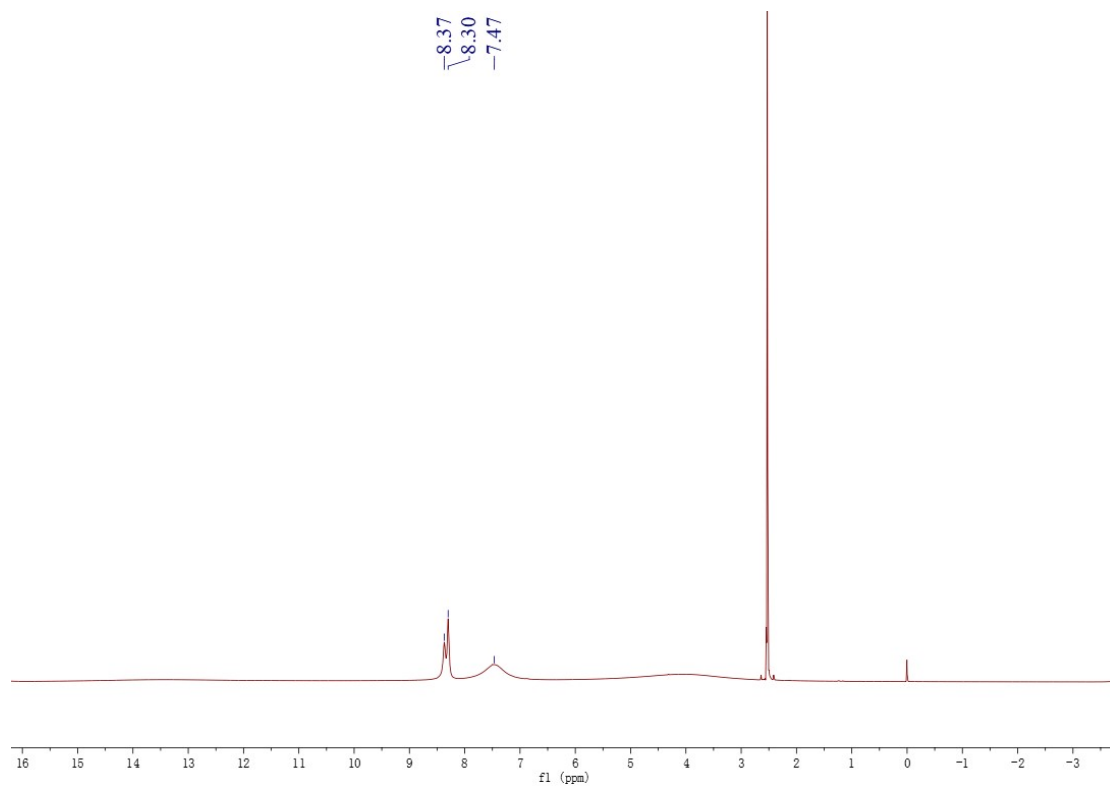

**Figure S15**  $^1\text{H}$  NMR of **8** ( $d_6$ -DMSO)

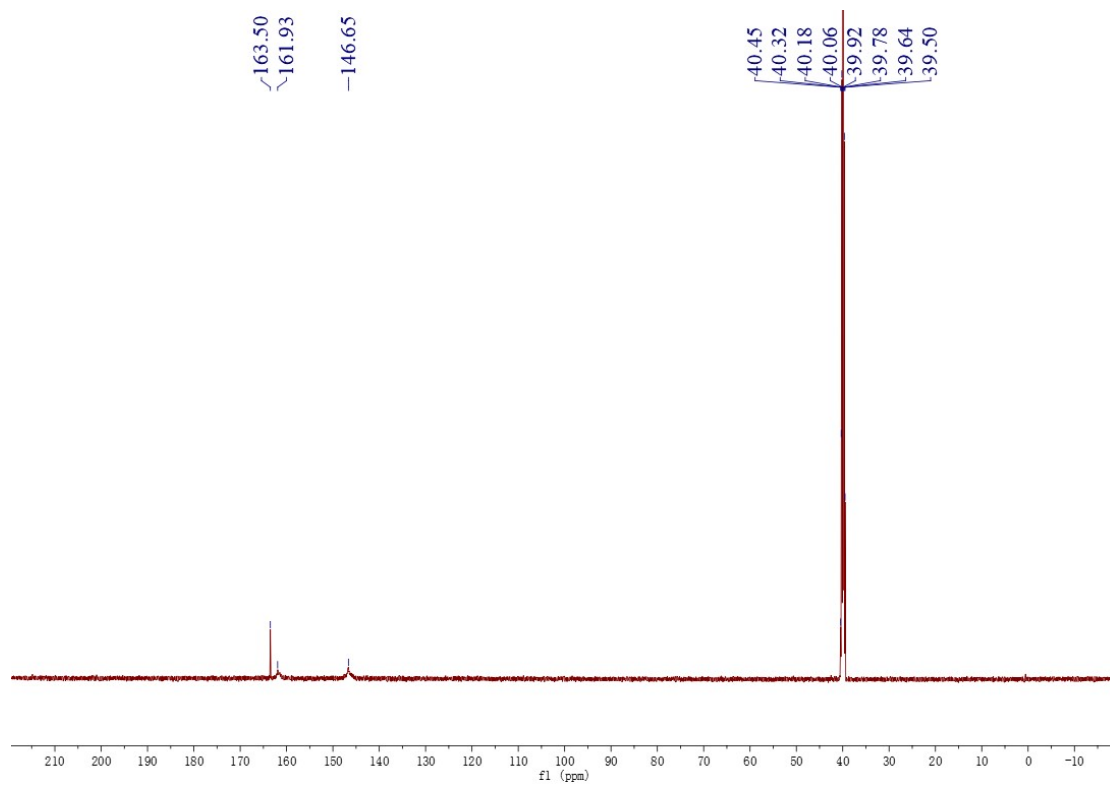

**Figure S16** <sup>13</sup>C NMR of **8** (*d*<sub>6</sub>-DMSO)

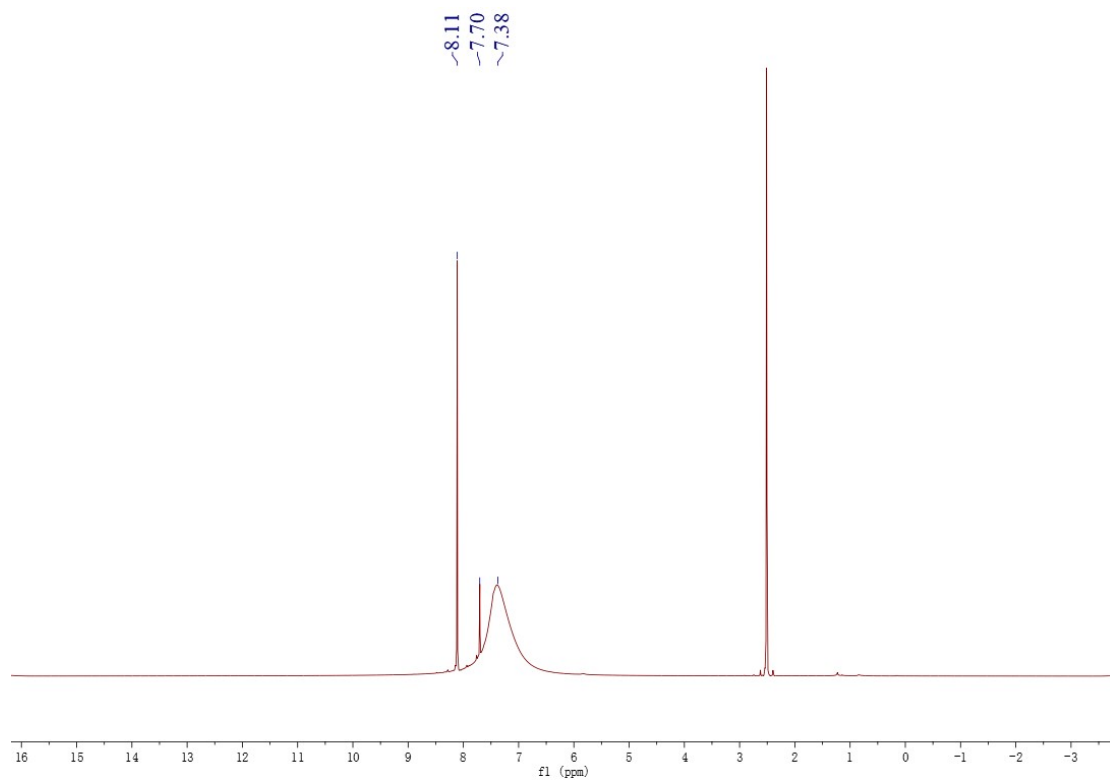

**Figure S17** <sup>1</sup>H NMR of **9** (*d*<sub>6</sub>-DMSO)

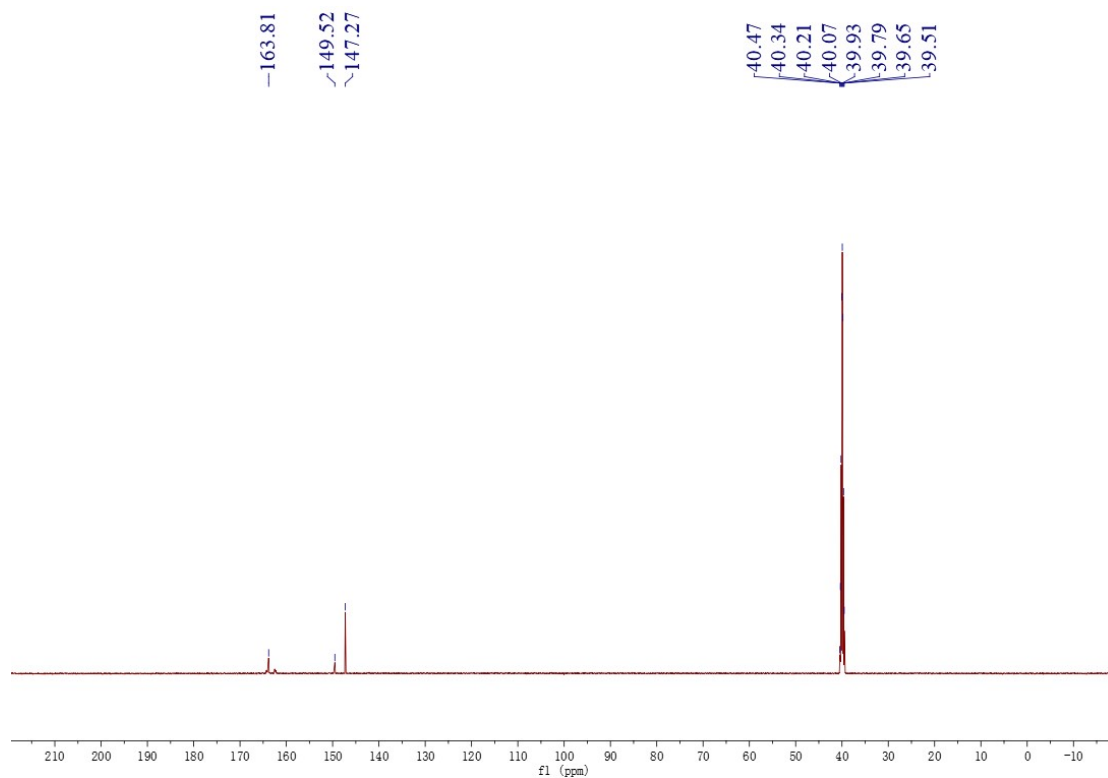

**Figure S18**  $^{13}\text{C}$  NMR of **9** ( $d_6$ -DMSO)

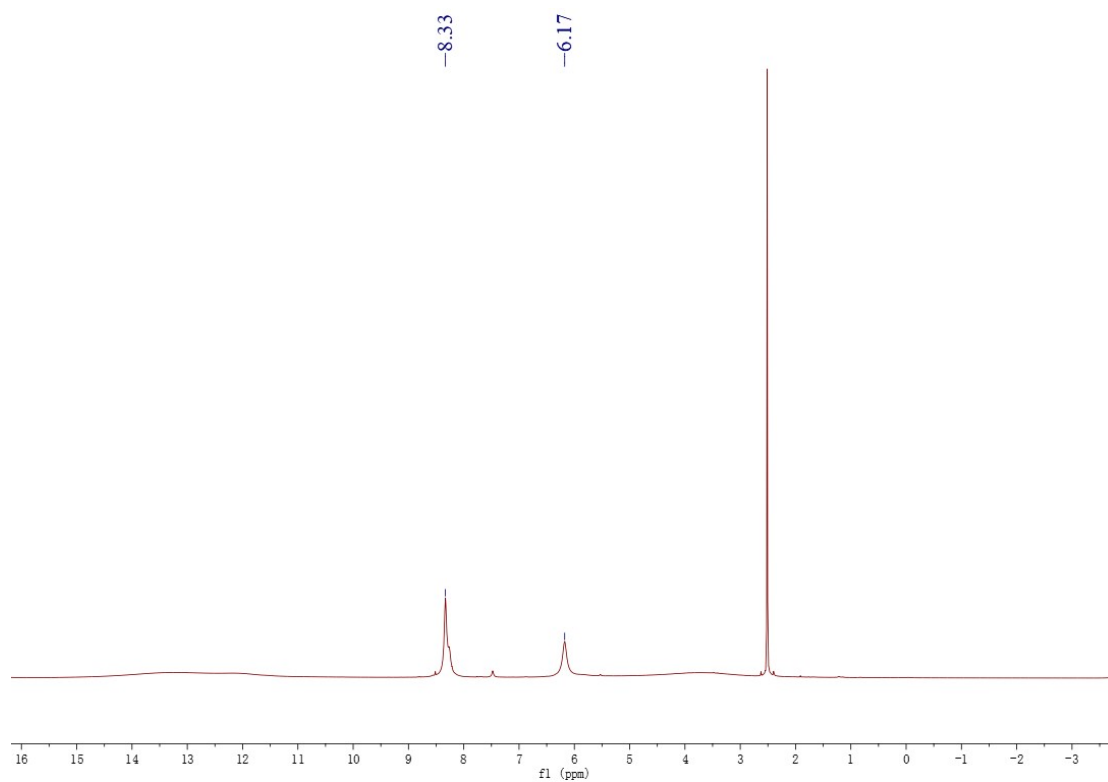

**Figure S19**  $^1\text{H}$  NMR of **10** ( $d_6$ -DMSO)



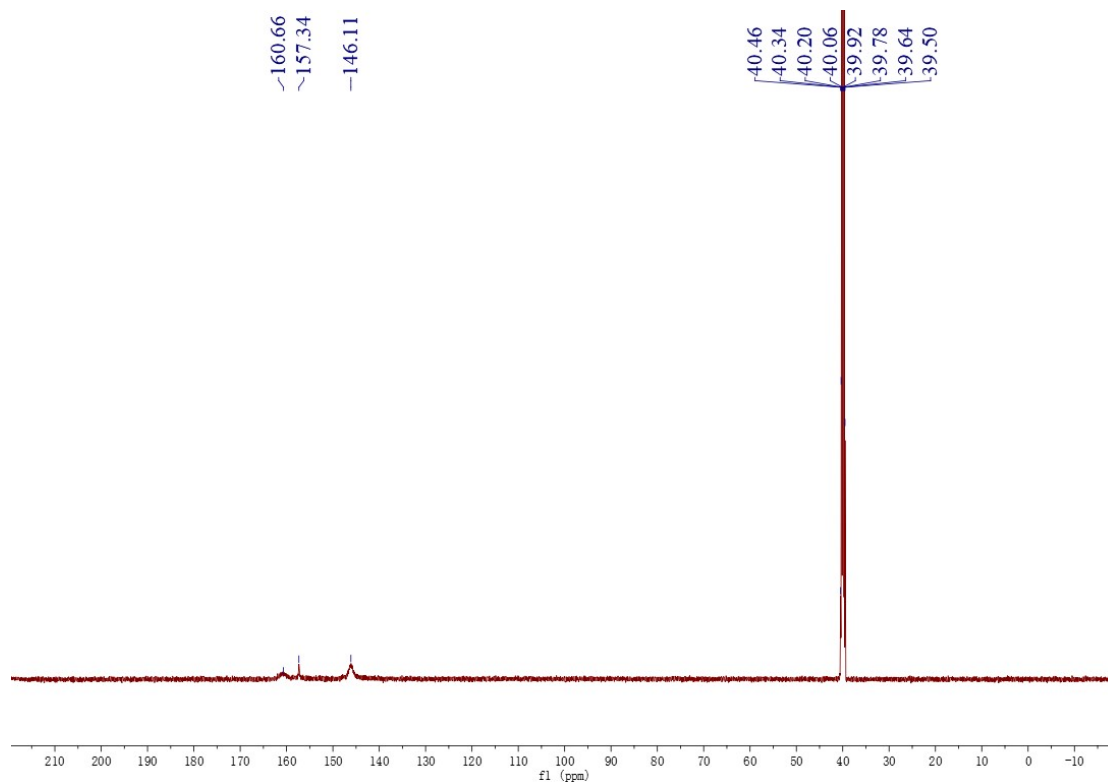

Figure S20  $^{13}\text{C}$  NMR of 10 ( $d_6$ -DMSO)

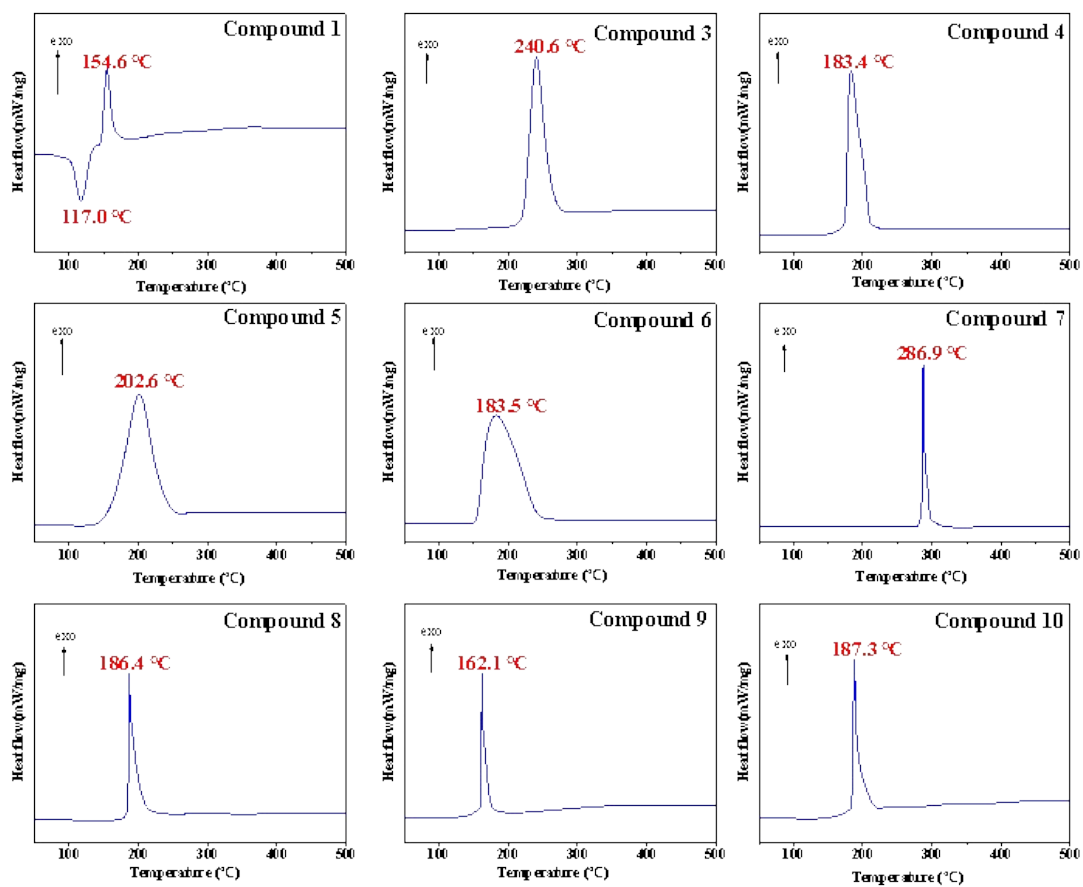

Figure S21 DSC curves of compounds 1 and 3-10

(a) BG Mode:None Segment 1 - Event 1

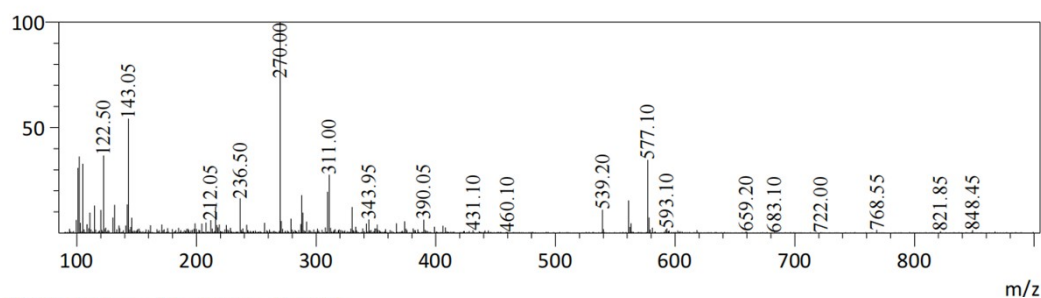

(b) BG Mode:None Segment 1 - Event 2

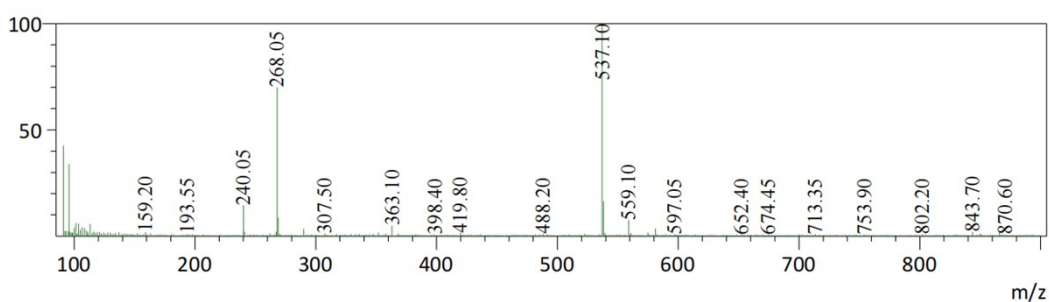

Figure S22 MS spectrum of compound 1 (a) ESI positive, (b) ESI negative

221019-1530-JXE-3 #9 RT: 0.09 AV: 1 NL: 6.61E7  
T: FTMS-pESI Full ms [50.0000,750.0000]

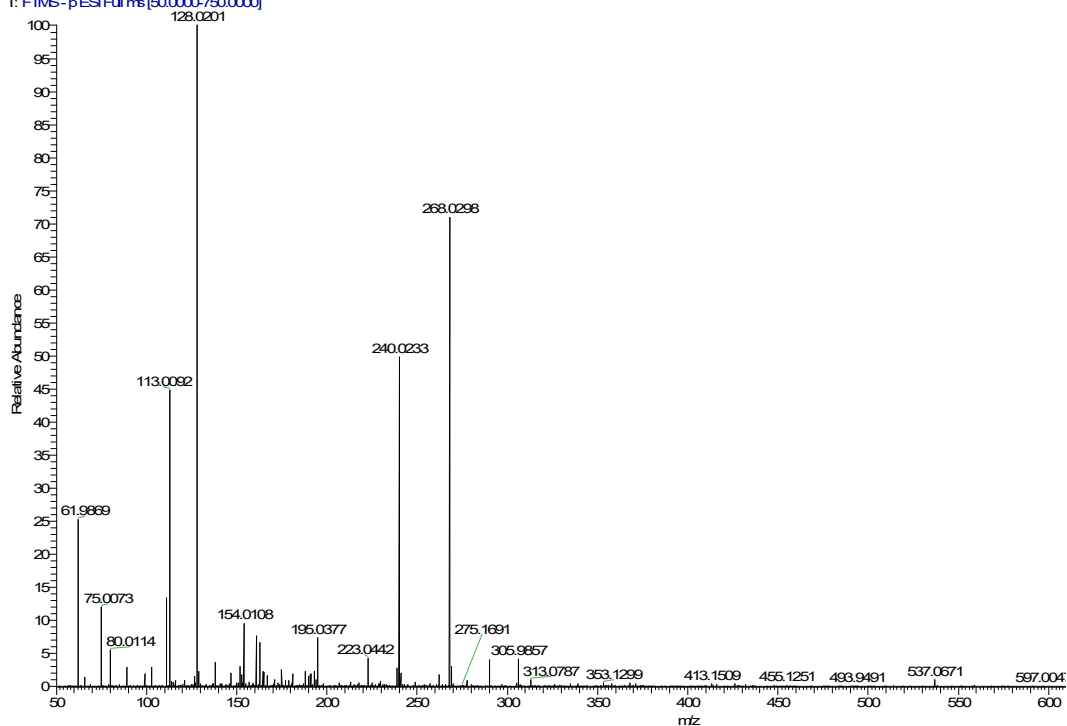

Figure S23 MS spectrum of compound 4

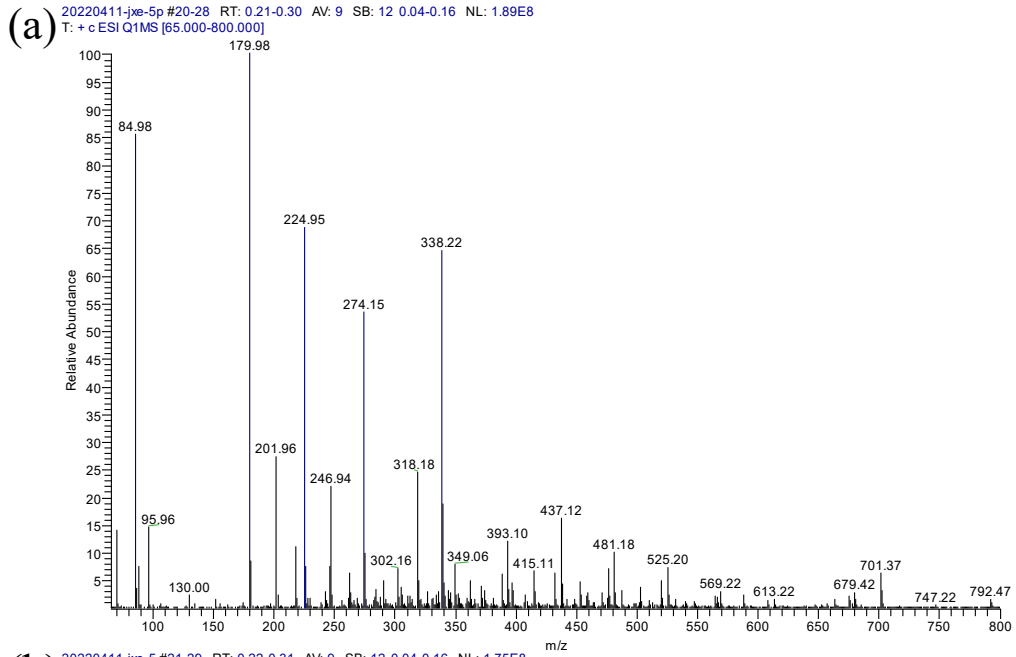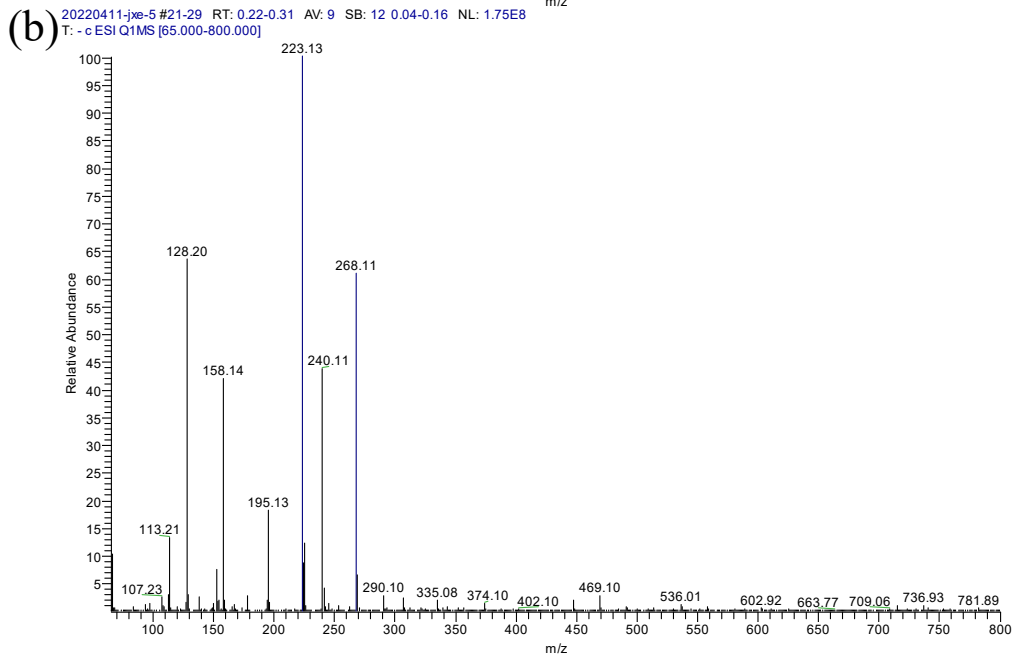

**Figure S24** MS spectrum of compound **6** (a) ESI positive, (b) ESI negative

BG Mode:None Segment 1 - Event 2

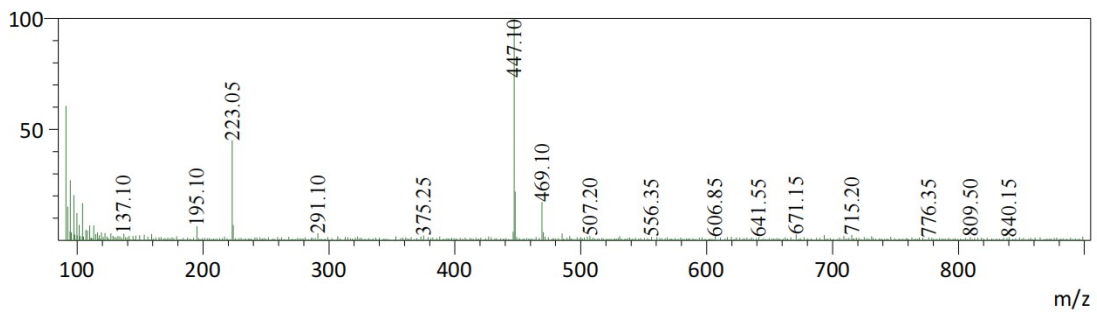

**Figure S25** MS spectrum of compound **7**

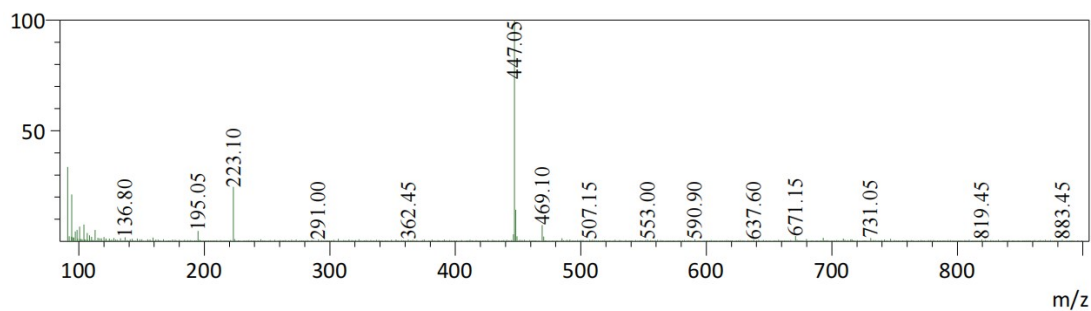

**Figure S26** MS spectrum of compound **8**

### Reference

- [1] Frisch M J, Trucks G W, Schlegel H B, et al. Gaussian 09, Gaussian, Inc. Wallingford, CT: 2009.
- [2] Becke A D. Density-functional thermochemistry. III. The role of exact exchange. *J Phys Chem*, 1993, 98, 5648-5652; b) Stephens P J, Devlin F J, Chabalowski C F, Frisch M J. Ab Initio Calculation of Vibrational Absorption and Circular Dichroism Spectra Using Density Functional Force Fields. *J Phys Chem*, 1994, 98, 11623-11627.
- [3] Hariharan, P C. and Pople, J A. The influence of polarization functions on molecular orbital hydrogenation energies. *Theoretica Chimica Acta*, 1973, 28, 213-222.
- [4] a) Schmidt M W, Gordon M S, Boatz J A. Triazolium-Based Energetic Ionic Liquids. *J Phys Chem A*, 2005, 109, 7285-7295; b) Gao H, Ye C, Piekarski C M, et al. Computational characterization of energetic salts. *The Journal of Physical Chemistry C*, 2007, 111(28): 10718-10731.
- [5] Jaidann M, Roy S, Abou-Rachid H, Lussier L S. A DFT theoretical study of heats of formation and detonation properties of nitrogen-rich explosives. *J Hazard Mater*, 2010, 176, 165-173.
- [6] Pople J A. Binkley J S, Seeger R. Theoretical models incorporating electron correlation. *Int J Quantum Chem*, 1976, 10, 1-19.
- [7] Xu X J, Xiao H M, Ju X H, Gong X D, Zhu W H. Computational Studies on Polynitrohexaazadmantanes as Potential High Energy Density Materials. *J Phys Chem A*, 2006, 110, 5929- 5933; b) Wang G X, Gong X D, Liu Y, Du H, Xu X, Xiao H M. A theoretical investigation on the structures, densities, detonation properties and pyrolysis mechanism of the nitro derivatives of toluenes. *J Hazard Mater*, 2010, 177, 703-710.
